# Supplementary material for: Prognostic value of Glypican family genes in early-stage pancreatic ductal adenocarcinoma after pancreaticoduodenectomy and possible mechanisms
Source: BMC Gastroenterol. 2020 Dec 10;20:415. doi: 10.1186/s12876-020-01560-0 (PMC7731467; doi:10.1186/s12876-020-01560-0)
Supplement: Supplementary file 9 — Additional file 9: Table 9. Genome-wide co-expression genes of Glypican5 in pancreatic ductal adenocarcinoma in The Cancer Genome Atlas database. [file 12876_2020_1560_MOESM9_ESM.xlsx]

## Sheet: Sheet1
Supplementary Table9 Genome-wide co-expression genes of Glypican5 in pancreatic ductal adenocarcinoma in The Cancer Genome Atlas database.
gene1	gene2	t	df	cor	ci0.95	p
GPC5	C5orf30	6.28	110	0.51	0.36, 0.64	7.03e-09
GPC5	DCTN1-AS1	6.27	110	0.51	0.36, 0.64	7.23e-09
GPC5	AC009784.3	6.26	110	0.51	0.36, 0.64	7.7e-09
GPC5	GPS2P2	6.23	110	0.51	0.36, 0.64	8.91e-09
GPC5	VILL	6.21	110	0.51	0.36, 0.63	9.83e-09
GPC5	KPNA7	6.45	110	0.52	0.37, 0.65	3.15e-09
GPC5	LPCAT4	6.38	110	0.52	0.37, 0.64	4.4e-09
GPC5	KCNH8	6.33	110	0.52	0.37, 0.64	5.56e-09
GPC5	MROH2A	6.48	110	0.53	0.38, 0.65	2.65e-09
GPC5	RP11-316N24.2	6.71	110	0.54	0.39, 0.66	8.89e-10
GPC5	MID2	6.68	110	0.54	0.39, 0.66	1.03e-09
GPC5	VDAC1P11	6.65	110	0.54	0.39, 0.66	1.19e-09
GPC5	ZFPM1	6.89	110	0.55	0.4, 0.67	3.67e-10
GPC5	GPR149	6.85	110	0.55	0.4, 0.67	4.34e-10
GPC5	PLA2G10	7.33	110	0.57	0.43, 0.69	4.02e-11
GPC5	CYSTM1	7.3	110	0.57	0.43, 0.68	4.75e-11
GPC5	GFI1B	7.56	110	0.58	0.45, 0.69	1.28e-11
GPC5	SULT1C2P1	7.48	110	0.58	0.44, 0.69	1.91e-11
GPC5	GATA6-AS1	7.76	110	0.59	0.46, 0.7	4.67e-12
GPC5	TRNP1	7.76	110	0.59	0.46, 0.7	4.69e-12
GPC5	RP11-57A19.4	7.67	110	0.59	0.45, 0.7	7.48e-12
GPC5	ANXA10	7.88	110	0.6	0.47, 0.71	2.55e-12
GPC5	RP11-276M12.1	8.17	110	0.61	0.48, 0.72	5.66e-13
GPC5	SLC9A1	8.04	110	0.61	0.48, 0.71	1.13e-12
GPC5	GATA6	8	110	0.61	0.47, 0.71	1.37e-12
GPC5	GPC5	498000000	110	1	1, 1	0
