# Supplementary material for: Prognostic value of Glypican family genes in early-stage pancreatic ductal adenocarcinoma after pancreaticoduodenectomy and possible mechanisms
Source: BMC Gastroenterol. 2020 Dec 10;20:415. doi: 10.1186/s12876-020-01560-0 (PMC7731467; doi:10.1186/s12876-020-01560-0)
Supplement: Supplementary file 11 — Additional file 11: Table 11. Kyoto Encyclopedia of Genes and Genomes pathways of Glypican5 and its co-expression genes in The Cancer Genome Atlas database. [file 12876_2020_1560_MOESM11_ESM.xlsx]

## Sheet: GPC5 KEGG
Supplementary Table 11 Kyoto Encyclopedia of Genes and Genomes pathways of Glypican5 and its co-expression genes in The Cancer Genome Atlas database.
Category	Term	Count	%	PValue	Genes	List Total	Pop Hits	Pop Total	Fold Enrichment	Bonferroni	Benjamini	FDR
KEGG_PATHWAY	hsa00565:Ether lipid metabolism	2	9.09091	0.0130414	PLA2G10, LPCAT4	3	45	6879	101.911	0.220745	0.220745	9.36966
KEGG_PATHWAY	hsa04972:Pancreatic secretion	2	9.09091	0.026858	PLA2G10, SLC9A1	3	93	6879	49.3118	0.40386	0.227899	18.4568
KEGG_PATHWAY	hsa00564:Glycerophospholipid metabolism	2	9.09091	0.0274316	PLA2G10, LPCAT4	3	95	6879	48.2737	0.410501	0.161517	18.8164
Abbreviations: KEGG, Kyoto Encyclopedia of Genes and Genomes.
